# Supplementary material for: A green cellulose nanofiber-based printed electrode for practical highly sensitive amoxicillin detection
Source: Royal Society of Chemistry journal article supplement (doi:10.1039/d3an00453h), 2023-01-01
Supplement: d3an00453h1.pdf [file d3an00453h1.pdf]

## Electronic Supplementary Information (ESI)

# Green cellulose nanofiber-based printed electrode for practical highly sensitive amoxicillin detection

Shaimah Rinda Sari,<sup>a</sup> Erika Shinchi,<sup>b</sup> Kenji Shida,<sup>c</sup> Yuly Kusumawati,<sup>d</sup> Kartika A. Madurani,<sup>e</sup> Fredy Kurniawan<sup>e</sup> and Masato Tominaga<sup>\*a</sup>

<sup>a</sup> Graduate School of Science and Engineering, Saga University, 1 Honjomachi, Saga 840-8502, Japan

<sup>b</sup> Analytical Research Center for Experimental Sciences, Saga University, 1 Honjomachi, Saga 840-8502, Japan

<sup>c</sup> Faculty of Engineering, Kumamoto University, 2-39-1 Kurokami, Kumamoto 860-8555, Japan

<sup>d</sup> Chemistry Department, Faculty of Sciences and Data Analytics, Institut Teknologi Sepuluh Nopember, Surabaya 60111, Indonesia

<sup>e</sup> Laboratory of Instrumentation and Analytical Sciences, Chemistry Department, Faculty of Science and Data Analytics, Institut Teknologi Sepuluh Nopember, Surabaya 60111, Indonesia

\*Corresponding author, Email: [masato@cc.saga-u.ac.jp](mailto:masato@cc.saga-u.ac.jp)

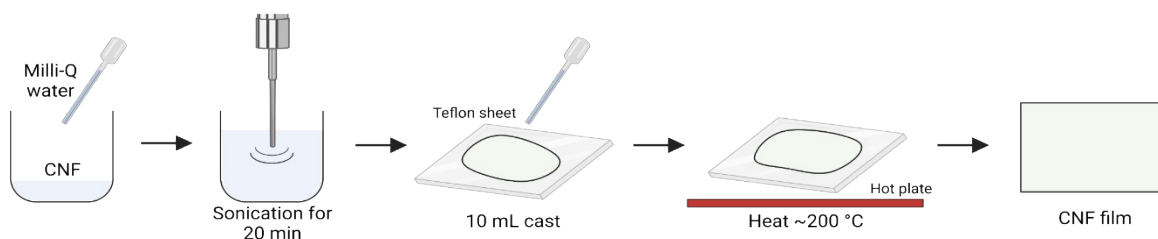

**Fig. S1** Scheme of CNF film preparation.

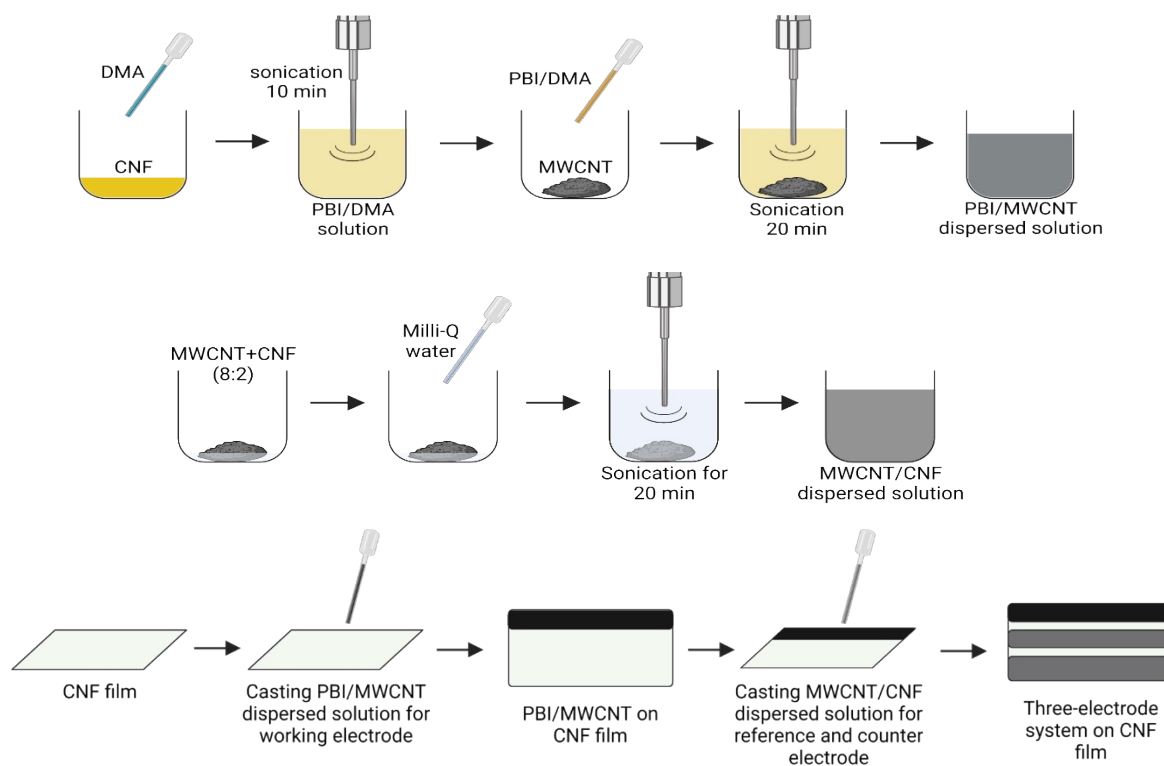

**Fig. S2** Scheme of CNF-based printed electrode preparation.

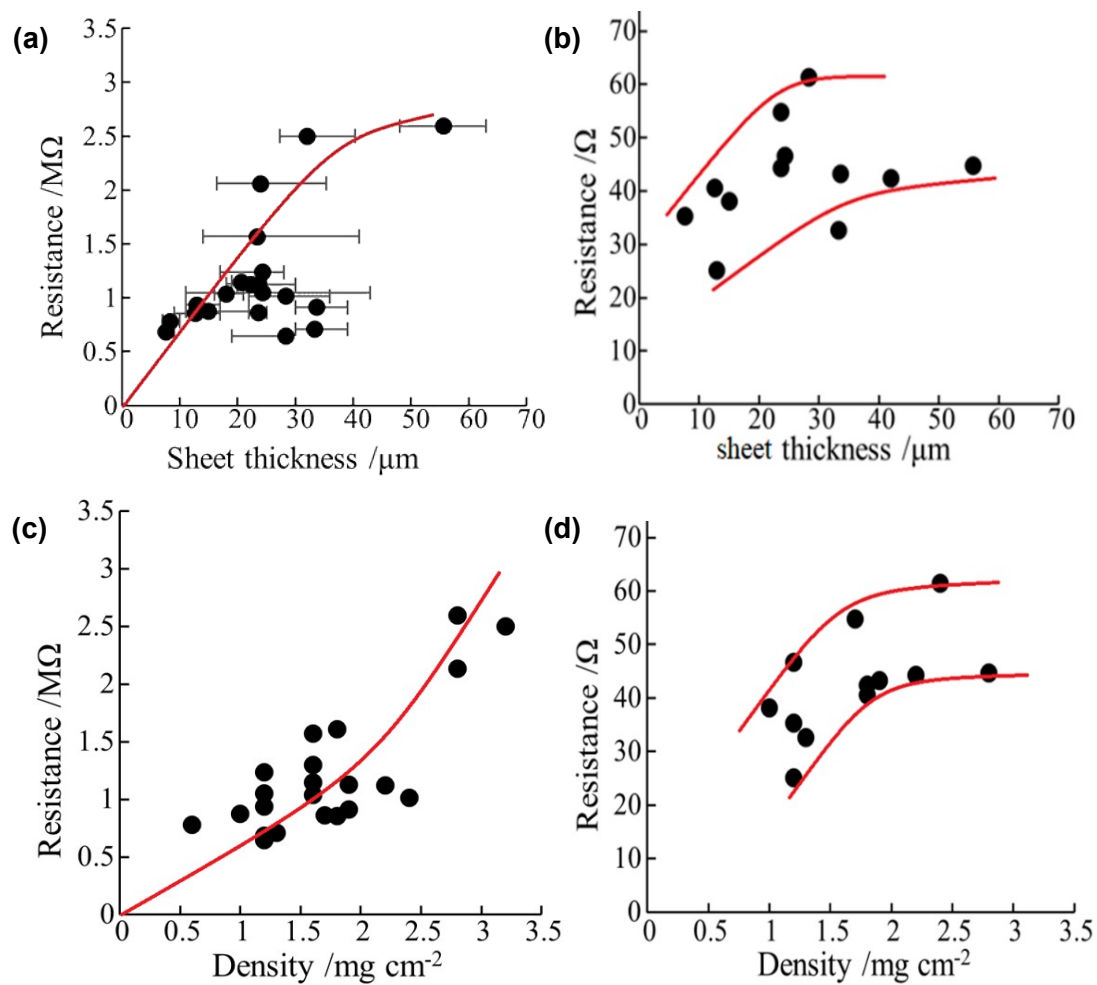

**Fig. S3** The variation of the resistance number as a function of the CNF film thickness for dry condition (a) and wet condition containing 0.1 M  $Na_2SO_4$  pH 7 (b). Resistivity vs. density for CNF film in dry condition (c) and wet condition containing 0.1 M  $Na_2SO_4$  pH 7 (d).

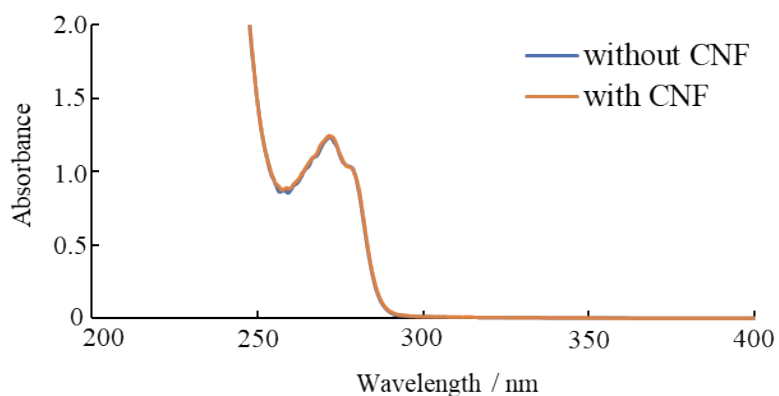

**Fig. S4** Ultraviolet-visible spectroscopy of 0.1 M Na<sub>2</sub>SO<sub>4</sub> (pH 7) solution containing 100 μM AMX in the absence (blue line) and presence (orange line) of CNF film with 1 hour immersion time.

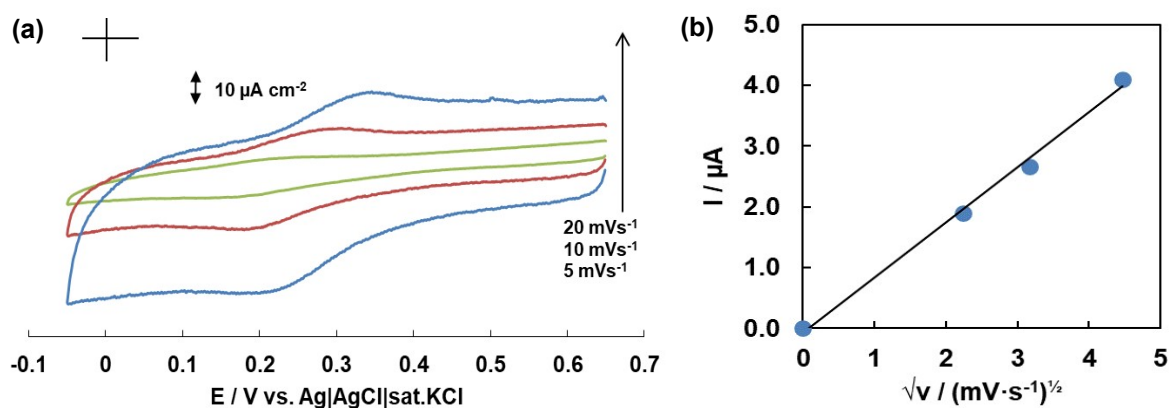

**Fig. S5** Cyclic voltammograms of 1.0 mM [Fe(CN)<sub>6</sub>]<sup>3-</sup> at the PBI/MWCNT-modified CNF-based printed electrode in 1.0 M KCl solution (pH 7) at various potential sweep rates (a) and plot of the cathodic peak current *versus* the square root of the potential sweep rate (b). UV-ozone treatment was performed for 3 min prior to each electrochemical measurements for the printed electrode.

CNF showed a typical cellulose I crystal form with characteristic peaks around  $2\theta = 16.5^\circ$  and  $22.5^\circ$  which corresponds to the (010) and (110), respectively. While the characteristic peak around  $2\theta = 26^\circ$  corresponds to the C (002) was not prominent thought to be the result of it merging with broad CNF peaks. With the addition of polymer matrix such as PBI, intensity of the characteristic peaks (CNF and MWCNT) was decreased, which indicated that amorphous PBI wrapped around the CNT nanofibers and on the surface of CNF. While all the diffraction peak intensities decreased in the nanocomposite, both the original characteristic structure of cellulose and carbon nanotube were still observed in the composite, suggesting a well-incorporation between the hybrid components.<sup>1</sup>

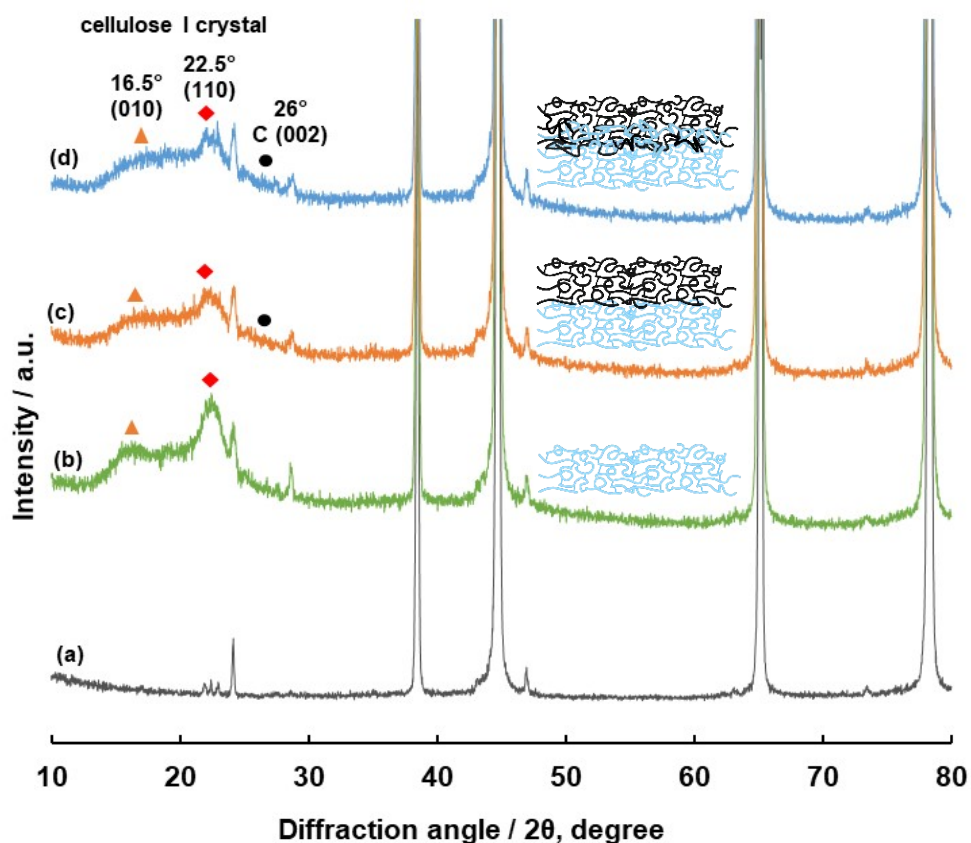

**Fig. S6** XRD patterns of aluminium plate (a), CNF film (b), MWCNT/CNF (c) and PBI/MWCNT/CNF (d).

Figure S7 shows a characteristic band assigned to  $\text{-OH}$  stretching of intramolecular hydrogen bonds in  $\text{CNF}^2$  was observed at  $3400\text{ cm}^{-1}$ . For both PBI/MWCNT/CNF samples in absence or presence of AMX, the intensities of the bands assigned to vibrations of  $\text{C-H}$  ( $2900\text{ cm}^{-1}$ ),  $\text{-CH}_2$  ( $1430$  and  $896\text{ cm}^{-1}$ ), and  $\text{C-H}$  ( $1373$  and  $896\text{ cm}^{-1}$ ) were much smaller or absent proving CNF film was covered with layers of PBI/MWCNT. PBI characteristic bands appeared around  $1610$  and  $802\text{ cm}^{-1}$  were also observed for both PBI/MWCNT/CNF samples. Special for PBI/MWCNT/CNF sample with AMX, peaks assigned for  $\text{C=O}$  stretching vibration of carbonyl group ( $1735\text{ cm}^{-1}$ ),  $\text{C-H}$  bending vibration ( $1247\text{ cm}^{-1}$ ), and benzene ring bending vibration ( $844\text{ cm}^{-1}$ ) were observed proving successful interaction between the modified film with AMX.

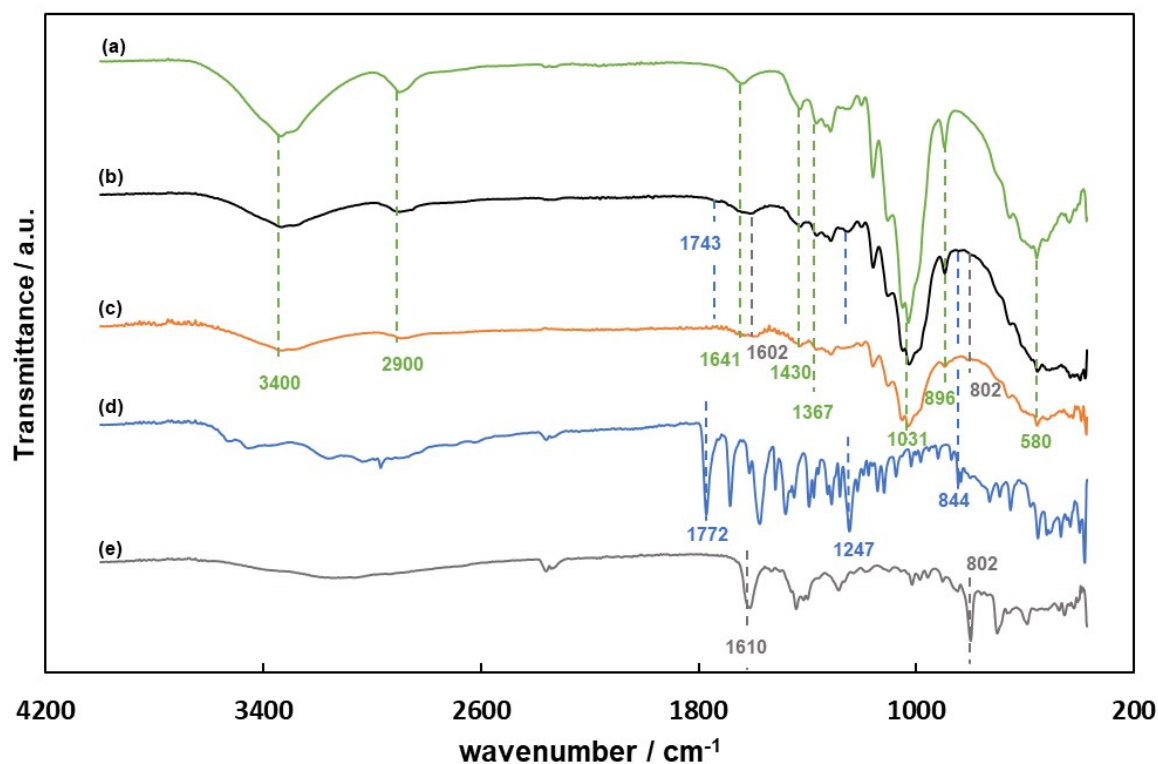

**Fig. S7** FT-IR spectra of CNF (a), PBI/MWCNT/CNF with AMX (b), PBI/MWCNT/CNF without AMX (c), AMX (d), and PBI (e).

### Computational simulation

Adsorption configuration was carefully designed and optimized by analyzing the possible binding sites in amoxicillin molecules. The interactions between the adsorbing amoxicillin molecule and benzimidazole molecule in the electrode surface were performed using the B3LYP level<sup>3</sup> with 6-31G\* basis sets<sup>4,5</sup> implemented in the Gaussian 16 code.<sup>6</sup> Avogadro 1.2.0 was used to visualize the calculation results including energy of the highest occupied molecular orbital ( $E_{\text{HOMO}}$ ), lowest unoccupied molecular orbital energy ( $E_{\text{LUMO}}$ ) and Mulliken charges. The  $E_{\text{ads}}$  (adsorption energy) were obtained as follows<sup>7,8</sup>

$$E_{\text{ads}} = E_{\text{amoxicillin} + \text{benzimidazole}} - (E_{\text{amoxicillin}} + E_{\text{benzimidazole}}) \quad (1)$$

where  $E_{\text{amoxicillin} + \text{benzimidazole}}$  represent the total energies of the interacted amoxicillin-benzimidazole in optimized adsorption configuration. Whereas  $E_{\text{amoxicillin}}$  and  $E_{\text{benzimidazole}}$  are isolated amoxicillin and benzimidazole molecule, respectively. The  $E_{\text{ads}}$  calculation shows the stability of amoxicillin-benzimidazole interactions on the electrode surface.<sup>9,10</sup>

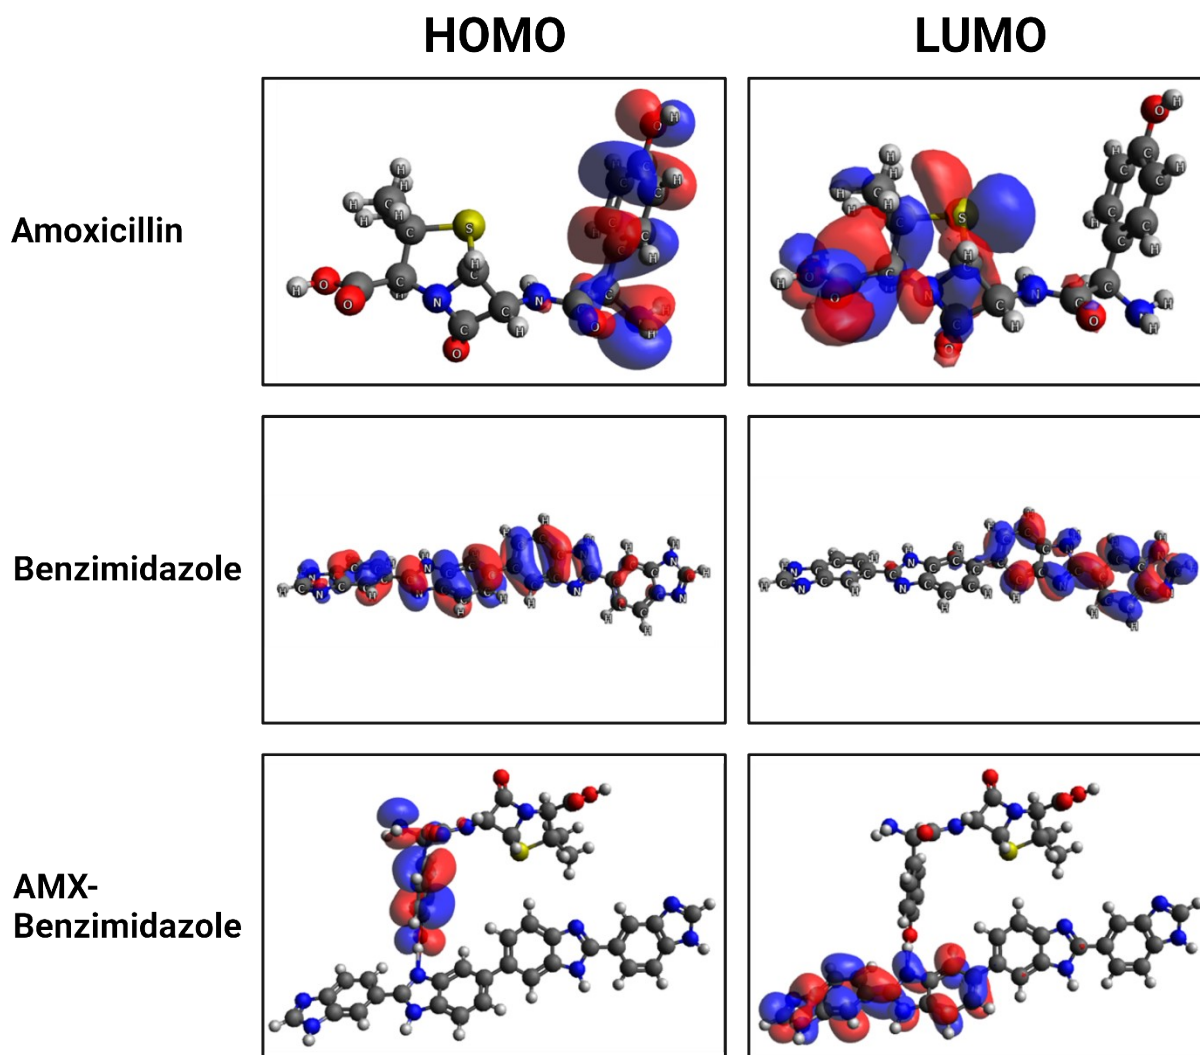

**Fig. S8** Distribution of highest occupied molecular orbital (HOMO) and lowest unoccupied molecular orbital (LUMO) for AMX with benzimidazole from computational simulation GAMESS. Color illustration: positive electrostatic potential is shown in dark blue and negative in red.

**Table S1** The calculated adsorption energy ( $E_{\text{ads}}$ ), binding distance ( $d$ ) and charge transfer ( $Q$ ) for possible amoxicillin molecule adsorption over benzimidazole surface.

| System            | $E_{\text{ads}}$ (kJ/mol) | $d_{(\text{O})-\text{PBI}}$ (Å) | $Q_{\text{AMX}}$ | $Q_{\text{PBI}}$ |
|-------------------|---------------------------|---------------------------------|------------------|------------------|
| AMX-Benzimidazole | -57.05                    | 2.812                           | -0.063           | 0.063            |



**Table S2** Reproducibility of reference electrode using CNF-based printed electrode.

| Reference electrode | $E / V$ vs. Ag AgCl sat.KCl |
|---------------------|-----------------------------|
| A                   | 0.61                        |
| B                   | 0.62                        |
| C                   | 0.61                        |
| D                   | 0.60                        |
| E                   | 0.59                        |
| F                   | 0.61                        |
| G                   | 0.61                        |
| H                   | 0.62                        |
| I                   | 0.59                        |

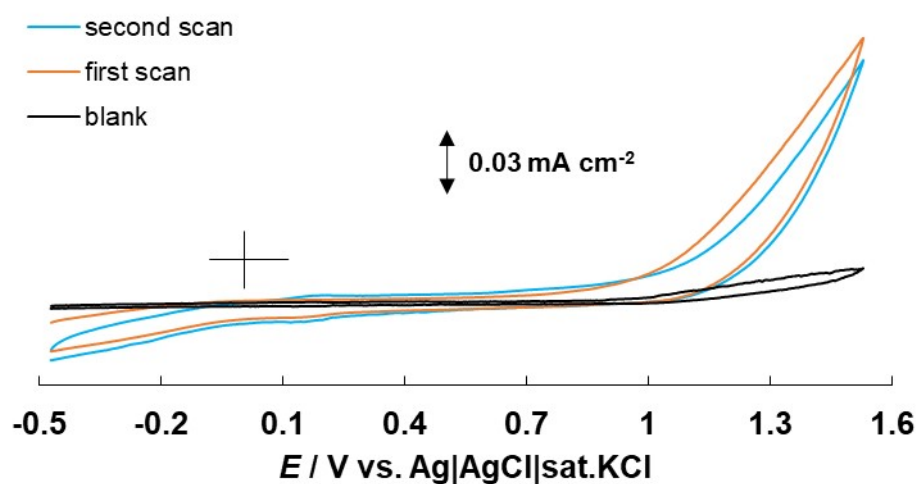

**Fig. S9** CV recorded at the PBI/MWCNT-modified CNF-based printed electrode in 0.1 M  $\text{Na}_2\text{SO}_4$  pH 7 for blank, first scan and second scan in the presence of 100  $\mu\text{M}$  AMX. Potential sweep rate: 10  $\text{mV s}^{-1}$ .

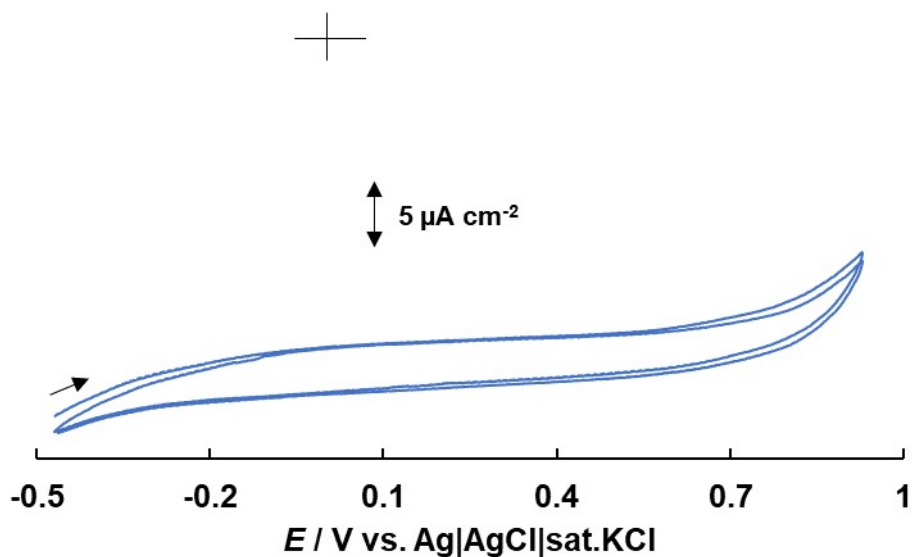

**Fig. S10** CV recorded for shorter potential range at the PBI/MWCNT-modified CNF-based printed electrode in 0.1 M  $\text{Na}_2\text{SO}_4$  pH 7 containing 100  $\mu\text{M}$  AMX. Potential sweep rate: 10  $\text{mV s}^{-1}$ .

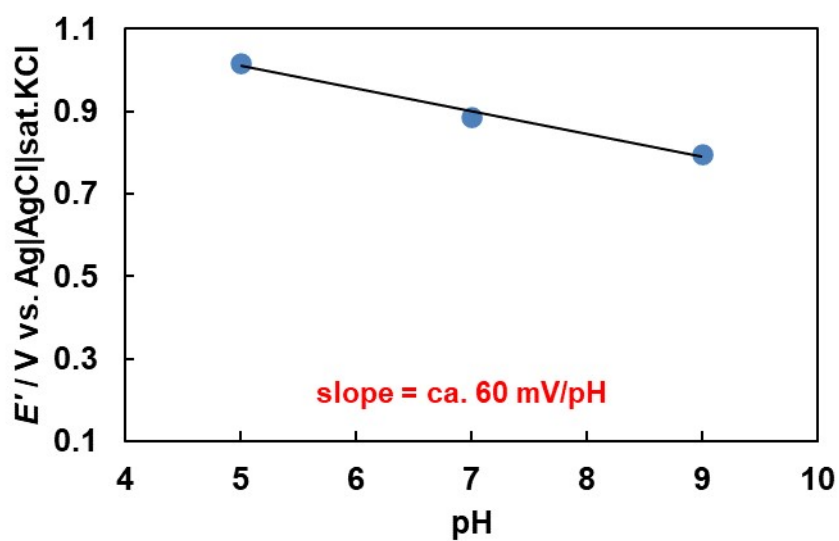

**Fig. S11** Plots of offset potentials vs. pH for first oxidation reaction at ca. 0.9 V in 0.1 M  $\text{Na}_2\text{SO}_4$  solution (pH 7) containing 100  $\mu\text{M}$  AMX using the PBI/MWCNT-modified CNF-based printed electrode.

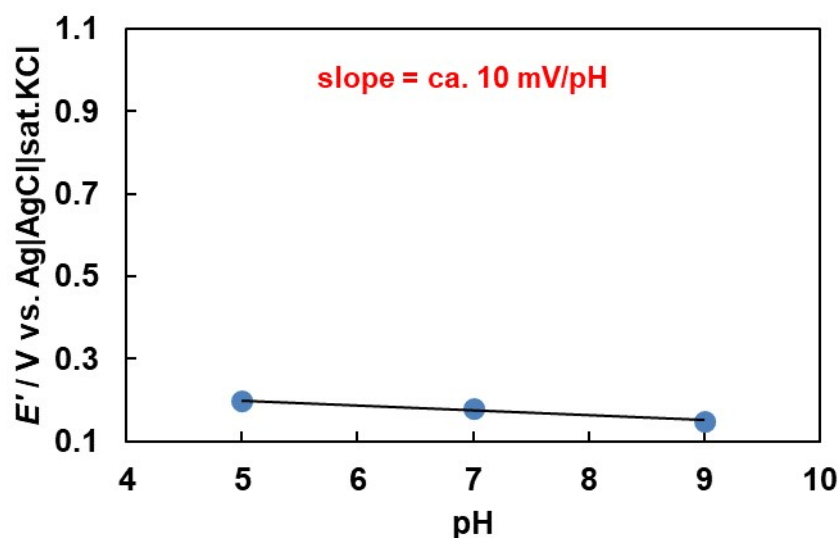

**Fig. S12** Plots of offset potentials vs. pH for second oxidation reaction at ca. 0.18 V in 0.1 M  $\text{Na}_2\text{SO}_4$  solution (pH 7) containing 100  $\mu\text{M}$  AMX using the PBI/MWCNT-modified CNF-based printed electrode.

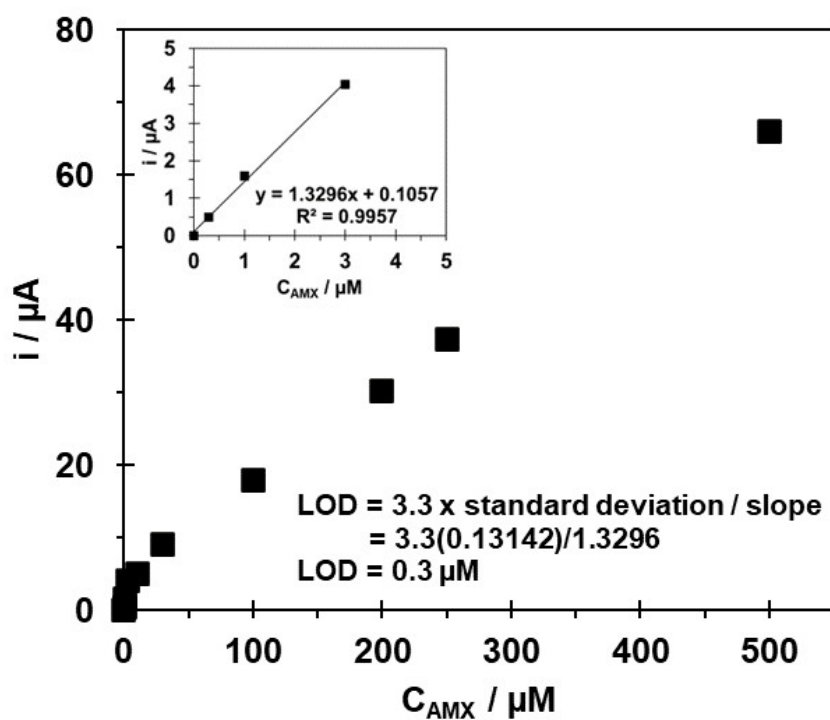

**Fig. S13** Estimation of limit of detection (LOD) for AMX determination using CNF-based printed electrode. LOD was estimated from the standard deviation of the response ( $\sigma$ ) of the curve and the slope of the calibration curve ( $S$ ) at linear part of the calibration curve as shown on the inset approximating the LOD according to the formula:  $\text{LOD} = 3.3(\sigma/S)$ , represented in the figure.

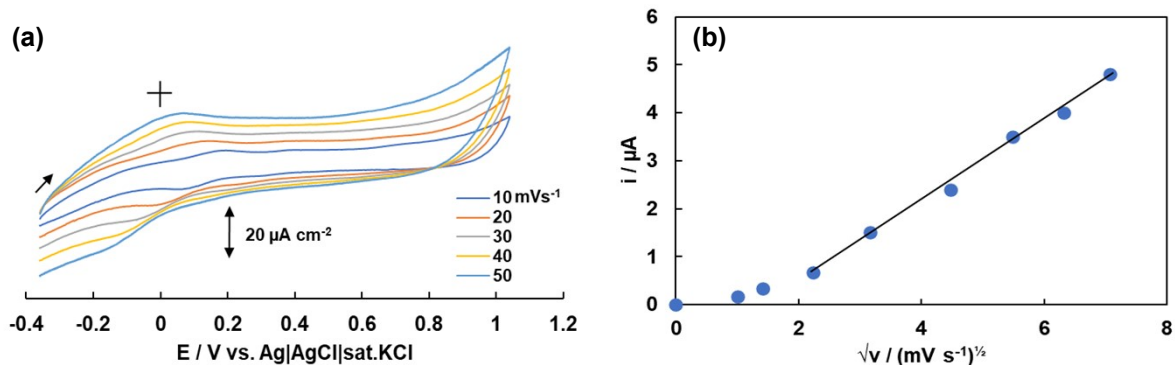

**Fig. S14** Cyclic voltammograms of 30  $\mu\text{M}$  AMX at the PBI/MWCNT-modified CNF-based printed electrode in 0.1 M  $\text{Na}_2\text{SO}_4$  solution (pH 7) at various potential sweep rates (a) and plot of the cathodic peak current *versus* the square root of potential sweep rate (b).

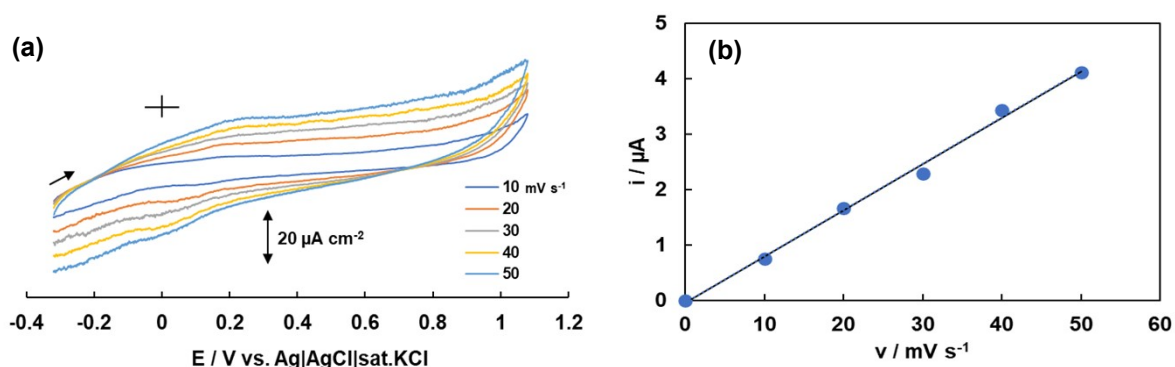

**Fig. S15** Cyclic voltammograms of 1.0  $\mu\text{M}$  AMX at the PBI/MWCNT-modified CNF-based printed electrode in 0.1 M  $\text{Na}_2\text{SO}_4$  solution (pH 7) at various potential sweep rates (a) and plot of the cathodic peak current *versus* the potential sweep rate (b).

### Randles-Sevcik equation

$$i_p = \pm (2.69 \times 10^5) n^{3/2} A D^{1/2} C v^{1/2} \quad (2)$$

where,

- $i_p$  : cathodic peak current ( $\text{A cm}^{-2}$ )
- $n$  : number of electrons involved in the reaction; assuming  $n = 1$
- $A$  : electrode surface area ( $A = 1 \text{ cm}^{-2}$ )
- $D$  : diffusion coefficient ( $\text{cm}^2 \text{ s}^{-1}$ )
- $C$  : redox probe concentration ( $C = 3 \times 10^{-5} \text{ mol cm}^{-3}$ )
- $v$  : potential scan rate ( $\text{V s}^{-1}$ )

### Nicholson equation

$$\Psi = k_s[\pi D n \nu F / (RT)]^{-1/2} \quad (3)$$

where,

- $\Psi$  : kinetic parameter  
 $k_s$  : electron transfer rate constant ( $\text{cm s}^{-1}$ )  
 $F$  : Faraday's constant ( $96485 \text{ C mol}^{-1}$ )  
 $RT$  : Boltzmann constant;  $R = 8.314 \text{ J K mol}^{-1}$ ,  $T \approx 298.15 \text{ K}$

### Adsorption isotherm

For an ideal electrochemical reaction involving a surface-bound species, considering the rate equation for a totally irreversible one-step, one-electron reaction,<sup>11</sup> can be written as

$$i = F A k^o C_O^{*(1-\alpha)} C_R^{*\alpha} \quad (4)$$

where,

- $i$  : cathodic peak current ( $\text{A cm}^{-2}$ )  
 $k^o$  : standard rate constant at the surface  
 $F$  : Faraday's constant ( $96485 \text{ C mol}^{-1}$ )  
 $A$  : electrode surface area ( $\text{A} = 1 \text{ cm}^2$ )  
 $C_O$  : initial concentration of O ( $1 \times 10^{-6} \text{ mol cm}^{-3}$ )  
 $C_R$  : initial concentration of R ( $1 \times 10^{-6} \text{ mol cm}^{-3}$ )  
 $\alpha$  : transfer coefficient ( $\alpha = 0.5$ )

### Stokes-Einstein equation

$$D = RT / 6\pi r \eta N \quad (5)$$

where,

- $D$  : diffusion coefficient ( $\text{cm}^2 \text{ s}^{-1}$ )  
 $r$  : radius of amoxicillin molecule (cm)  
 $\eta$  : viscosity of solvent (P)  
 $\eta_{25}$  of pure water =  $0.00895$  poise  
 $N$  : Avogadro's number  
 $R$  : gas constant ( $\text{erg K}^{-1} \text{ mol}^{-1}$ )  
 $T$  : temperature (K)

$$D_1 = \frac{(8.314 \times 10^7)(298)}{6\pi(7.25 \times 10^{-8})(0.00895)(1)} = 6.75 \times 10^{-6} \text{ cm}^2 \text{ s}^{-1}$$

$$D_2 = \frac{(8.314 \times 10^7)(298)}{6\pi(9.30 \times 10^{-8})(0.00895)(1)} = 5.26 \times 10^{-6} \text{ cm}^2 \text{ s}^{-1}$$

$$D_3 = \frac{(8.314 \times 10^7)(298)}{6\pi(4.23 \times 10^{-8})(0.00895)(1)} = 1.16 \times 10^{-5} \text{ cm}^2 \text{ s}^{-1}$$

### Electrochemically active surface area evaluated from double-layer capacitance

The electrochemically active surface area (ECSA) of a catalyst sample can be calculated with a cyclic voltammetry (CV) method. We calculated the double-layer capacitance ( $C_{dl}$ ) of the PBI/MWCNT-modified CNF-based printed electrode based on the scan rate dependence of cyclic voltammetry measurements. By plotting the difference in current density between anodic and cathodic sweeps at a fixed potential (0.5 V vs Ag|AgCl|sat.KCl) against the scan rate, a linear trend is observed. The fitting slope is twice of  $C_{dl}$ , which is linearly proportional to the ECSA, according to the following formula:

$$ECSA = \frac{C_{dl}}{C_s} \quad (6)$$

where  $C_s$  is the specific capacitance. As seen from Fig. S14, for the PBI/MWCNT-modified CNF-based printed electrode,  $C_{dl} = 0.53 \mu\text{F cm}^{-2}$ . Assumed the  $C_s$  of the well-ordered graphite structure from our previously reported value of  $2\text{--}5 \mu\text{F cm}^{-2}$  with small defect, the ECSA of  $0.265\text{--}0.106 \text{ cm}^2$  was obtained.<sup>12</sup>

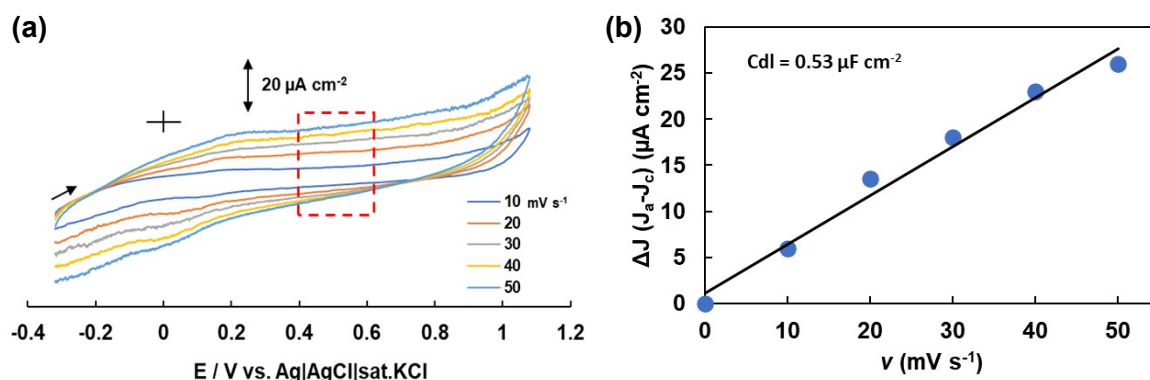

**Fig. S16** (a) CV curves of the PBI/MWCNT-modified CNF-based printed electrode in 0.1 M  $\text{Na}_2\text{SO}_4$  solution (pH 7) at different scan rate (10–50  $\text{mV s}^{-1}$ ) where potential window of non-Faradaic region from around 0.4 to 0.6 V was selected to determine  $C_{dl}$  (electrochemical double layer capacitance) and (b) Linear fitting of the current densities at 0.5 V versus scan rates for the previous CV measurements.

### Theoretically surface concentration

- Based on AMX molecule size

$$\Gamma_{AMX} = \frac{\left[ \frac{1 \text{ moles}}{(A \text{ cm}^{-2})} \right]}{\text{Avogadro's number}} = \frac{[1/(2(137.4315) \times 10^{-16}) \text{ cm}^{-2}]}{6.022 \times 10^{23}} = 6 \times 10^{-11} \text{ mol cm}^{-2}$$

- Based on MWCNT specific surface area

Specific surface area of MWCNT =  $713 \text{ m}^2 \text{ g}^{-1}$

$M_w$  of AMX =  $\sim 400 \text{ g mol}^{-1}$

40 mg of MWCNT =  $4 \times 10^{-4} \text{ mol g}^{-1}$

$$\Gamma_{AMX} = \frac{4 \times 10^{-4} \text{ mol g}^{-1}}{713 \text{ m}^2 \text{ g}^{-1}} = \frac{4 \times 10^{-4} \text{ mol}}{7.13 \times 10^6 \text{ cm}^2} = \sim 6 \times 10^{-11} \text{ mol cm}^{-2}$$

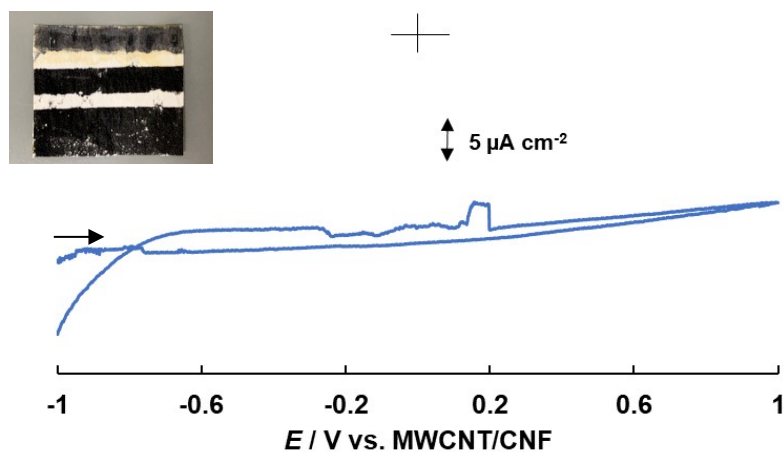

**Fig. S17** Cyclic voltammograms recorded at  $10 \text{ mV s}^{-1}$  for the PBI/MWCNT-modified CNF-based printed electrode with copy paper platform in  $0.1 \text{ M Na}_2\text{SO}_4$  pH 7 containing  $100 \mu\text{M}$  AMX. The inset figure shows the modified disposable electrode.

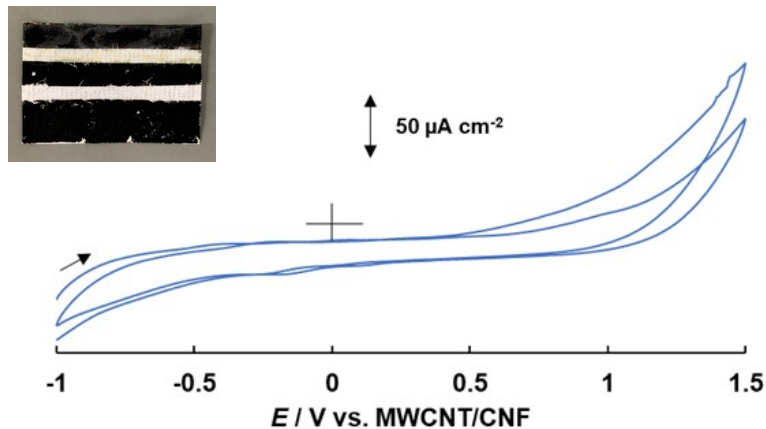

**Fig. S18** Cyclic voltammograms recorded at  $10 \text{ mV s}^{-1}$  for the PBI/MWCNT-modified CNF-based printed electrode with calligraphy paper platform in  $0.1 \text{ M Na}_2\text{SO}_4$  pH 7 containing  $250 \mu\text{M}$  AMX. The inset figure shows the modified disposable electrode.

**Table S3** Characteristics of different platform used for modified electrode.

| Platform material | Resistance / $\Omega$ | Average thickness / $\mu\text{m}$ | Peak current / $\mu\text{A}$ | Additional information              |
|-------------------|-----------------------|-----------------------------------|------------------------------|-------------------------------------|
| CNF               | 120                   | $39 \pm 1$                        | 4                            | easy to modify                      |
| Copy paper        | 840                   | $145 \pm 1$                       | not detected                 | difficult to modify within template |

|                   |     |            |     |                                                       |
|-------------------|-----|------------|-----|-------------------------------------------------------|
| Calligraphy paper | 390 | $80 \pm 1$ | 2.5 | difficult to modify within template, poor sensitivity |
|-------------------|-----|------------|-----|-------------------------------------------------------|

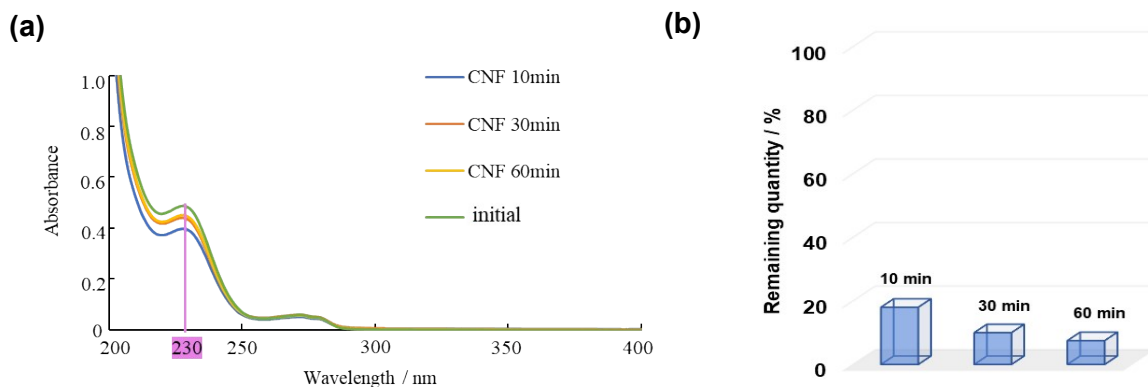

**Fig. S19** Ultraviolet-visible spectroscopy of amoxicillin adsorption behavior on CNF film (a) and remaining amount of amoxicillin on CNF film with different immersion time inside 0.1 M  $\text{Na}_2\text{SO}_4$  solution (pH 7) (b). At first, CNF films were treated with 100  $\mu\text{M}$  AMX solution and left to dry overnight under vacuum conditions (0.06 MPa). They were then immersed in 0.1 M  $\text{Na}_2\text{SO}_4$  solution (pH 7) for 10, 30, and 60 minutes prior to measurements.

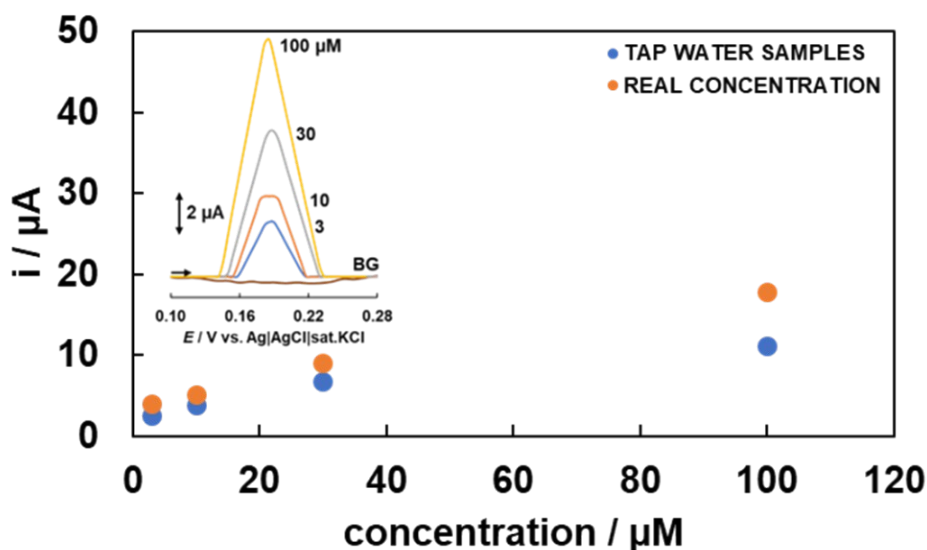

**Fig. S20** AMX concentrations versus peak current value comparison for real concentration and tap water samples. Insets show the square wave voltammograms of the PBI/MWCNT-modified CNF-based printed electrode for tap water samples containing different concentration of AMX with supporting electrolyte of 0.1 M  $\text{Na}_2\text{SO}_4$  solution (pH 7).



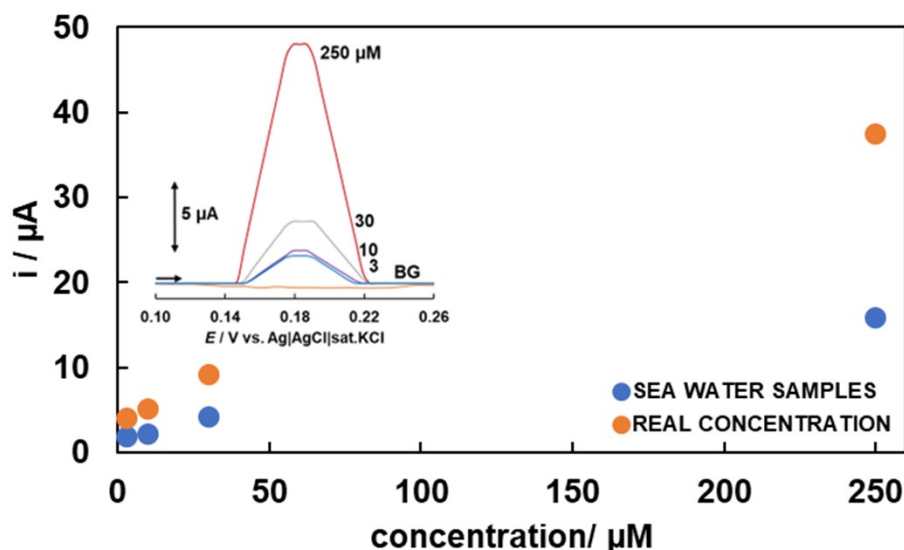

**Fig. S21** AMX concentrations versus peak current value comparison for real concentration and sea water samples. Insets show the square wave voltammograms of the PBI/MWCNT-modified CNF-based printed electrode for sea water samples containing different concentration of AMX with supporting electrolyte of 0.1 M Na<sub>2</sub>SO<sub>4</sub> solution (pH 7).

## References

- 1 C. Chen, X. Bu, Q. Feng, and D. Li, *Polymers*, 2018, **10**, 1000.
- 2 M. Tominaga, K. Kuwahara, M. Tsushida, and K. Shida, *RSC Advances*, 2020, **10**, 22120–22125.
- 3 A. D. Becke, *J. Chem. Phys.*, 1993, **98**, 5648–5652.
- 4 A. D. McLean and G. S. Chandler, *J. Chem. Phys.*, 2008, **72**, 5639–5648.
- 5 R. Krishnan, J. S. Binkley, R. Seeger, and J. A. Pople, *J. Chem. Phys.*, 1980, **72**, 650–654.
- 6 M. J. Frisch *et al.*, *Gaussian 09, Revision A.02*. Wallingford CT: Gaussian, Inc., 2016.
- 7 R. Gholami and M. Solimannejad, *Struct. Chem.*, 2023, **34**, 577–584.
- 8 H. Juwono, A. F. Imron, N. I. Oktavianti, A. L. Ivansyah, and Y. Kusumawati, *Monatshefte Für Chem. - Chem. Mon.*, 2022, **153**.
- 9 A. O. Osikoya, F. Opoku, and P. P. Govender, *Chem. Phys. Lett.*, 2021, **764**, 138278.
- 10 M. Ding, D. C. Sorescu, and A. Star, *J. Am. Chem. Soc.*, 2013, **135**, 9015–9022.
- 11 A.J. Bard and L.R. Faulkner, *Electrochemical methods: fundamentals and applications*, John Wiley & Sons, 2001, pp. 569–572.
- 12 M. Tominaga, S. Sakamoto, and H. Yamaguchi, *J. Phys. Chem. C*, 2012, **116**, 9498–9506.
